# Supplementary material for: Activin E–ACVR1C cross talk controls energy storage via suppression of adipose lipolysis in mice
Source: PubMed Central journal article supplement — Proc Natl Acad Sci U S A. 2023 Jul 31;120(32):e2309967120. doi: 10.1073/pnas.2309967120 (PMC10410708; doi:10.1073/pnas.2309967120), 2023-07-31
Supplement: pnas.2309967120.sapp.pdf [file pnas.2309967120.sapp.pdf]

**Activin E-ACVR1C crosstalk controls energy storage  
via suppression of adipose lipolysis in mice**

Rene C. Adam<sup>a</sup>, Dwaine S. Pryce<sup>a</sup>, Joseph S. Lee<sup>a</sup>, Yuanqi Zhao<sup>a</sup>, Ivory J. Mintah<sup>a</sup>, Soo Min<sup>a</sup>, Gabor Halasz<sup>a</sup>, Jason Mastaitis<sup>a</sup>, Gurinder S. Atwal<sup>a</sup>, Senem Aykul<sup>a</sup>, Vincent Idone<sup>a</sup>, Aris N. Economides<sup>a</sup>, Luca A. Lotta<sup>a</sup>, Andrew J. Murphy<sup>a</sup>, George D. Yancopoulos<sup>a,b</sup>, Mark W. Sleeman<sup>a</sup>, Viktoria Gusarova<sup>a,b</sup>

<sup>a</sup>Regeneron Pharmaceuticals, Tarrytown, New York, 10591, USA

<sup>b</sup>To whom correspondence may be addressed: Viktoria Gusarova, PhD

Regeneron Pharmaceuticals, Inc.

777 Old Saw Mill River Road, Tarrytown, New York, 10591, USA

Phone number: +1-914-847-3018

email: [Viktoria.Gusarova@regeneron.com](mailto:Viktoria.Gusarova@regeneron.com)

<sup>b</sup>To whom correspondence may be addressed: George D. Yancopoulos, MD, PhD

Regeneron Pharmaceuticals, Inc.

777 Old Saw Mill River Road, Tarrytown, New York, 10591, USA

Phone number: +1-914-847-7423

email: [George.Yancopoulos@regeneron.com](mailto:George.Yancopoulos@regeneron.com)

**Author contributions:** R.C.A., G.H., J.M., G.S.A., V.I., A.N.E. and V.G. designed research. R.C.A., D.S.P., J.S.L., Y.Z., I.J.M., S.M. and G.H. performed research and analyzed data. S.A. contributed new reagents/analytic tools. R.C.A., J.M., A.N.E., L.A.L., A.J.M., G.D.Y., M.W.S. and V.G. wrote the paper.

**Competing interest statement:** R.C.A., D.S.P., J.S.L., Y.Z., I.J.M., S.M., G.H., J.M., G.S.A., S.A., V.I., A.N.E., L.A.L., A.J.M., G.D.Y., M.W.S. and V.G. are employees and shareholders at Regeneron Pharmaceuticals.

**Classification:** BIOLOGICAL SCIENCES / Cell Biology

**Keywords:** INHBE (Activin E), ACVR1C; body fat distribution; lipolysis; diabetes

**This PDF file includes:**

Figures S1 to S5

Legends for Datasets S1 and S2

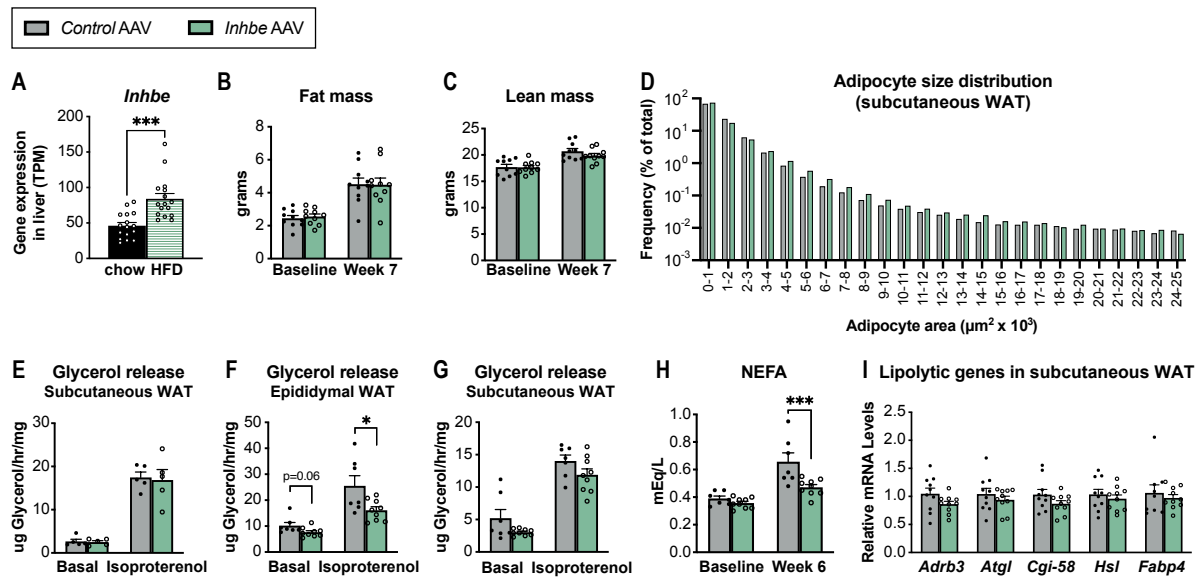

**Fig. S1.** Activin E is increased upon high fat feeding and impairs adipose lipolysis. (A) Hepatic *Inhbe* gene expression on chow and high fat diet (HFD) (TPM: transcripts per million) ( $n = 16$ ). (B and C) Body composition of male *Control AAV* and *Inhbe AAV*-treated WT mice. Fat mass (B) and lean mass (C) were analyzed by echoMRI ( $n = 10$ ). (D) Adipocyte morphology and size distribution measured by imaging software in H&E-stained subcutaneous WAT sections ( $n = 641490$  cells for *Control AAV* and 585827 cells for *Inhbe AAV* analyzed from 10 mice/group). (E) *Ex vivo* lipolysis with subcutaneous WAT explants from WT mice under basal and isoproterenol-stimulated conditions ( $n = 5$ ). (F and G) *Ex vivo* lipolysis with epididymal (F) and subcutaneous (G) WAT explants from *db/db* mice ( $n = 7$  for *Control AAV*, 9 for *Inhbe AAV*). (H) Fasted plasma NEFA levels in *db/db* mice ( $n = 7$  for *Control AAV*, 9 for *Inhbe AAV*). (I) Subcutaneous WAT mRNA levels of genes involved in adipose lipolysis, relative to *Control AAV* ( $n = 10$ ). Mean  $\pm$  s.e.m. are shown in all graphs besides (D), where mean is shown. \* $P < 0.05$ , \*\*\* $P < 0.001$  relative to *Control AAV*.

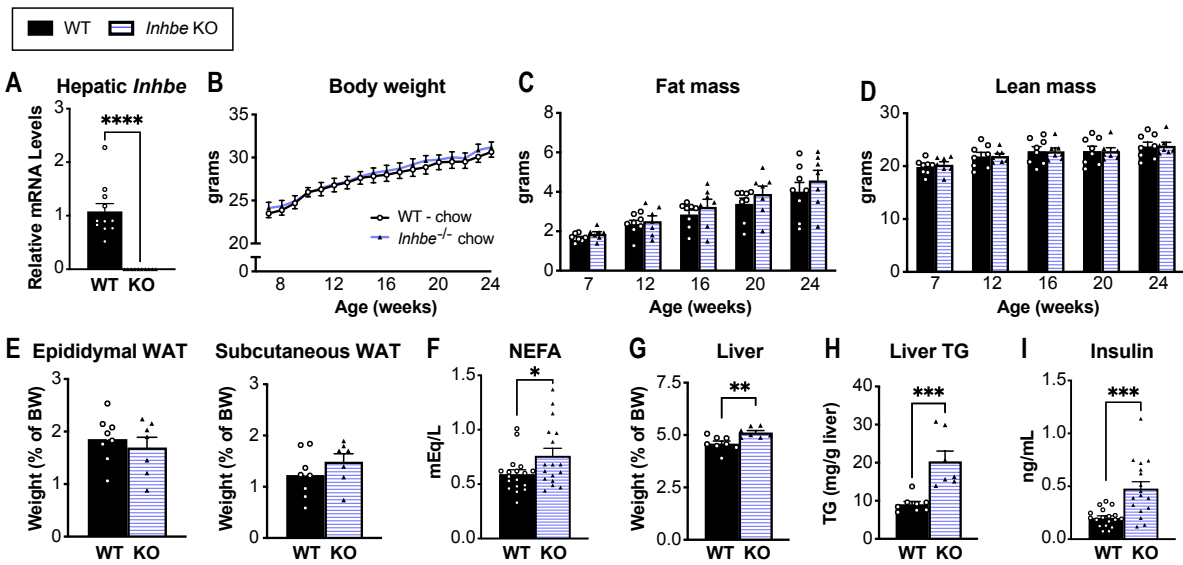

**Fig. S2.** *Inhbe* KO mice exhibit increased fasting liver lipid content on chow diet. (A) Hepatic Liver mRNA levels of *Inhbe* in WT and *Inhbe*<sup>-/-</sup> mice (*n* = 10-11). (B) Body weights in 7–24 week old male WT and *Inhbe*<sup>-/-</sup> mice on chow diet (*n* = 7-8). (C and D) Body composition measured by echoMRI to determine fat (C) and lean mass (D) of male WT and *Inhbe*<sup>-/-</sup> mice on chow diet (*n* = 7-8). (E) Weights of visceral (epididymal) and subcutaneous (inguinal) white adipose tissue on chow diet (*n* = 7-8). (F) Plasma NEFA levels on chow diet (*n* = 15-16). (G and H) Fasted liver weight (G) and hepatic triglyceride content (H) in *Inhbe*<sup>-/-</sup> mice on chow diet (*n* = 7-8). (I) Plasma insulin levels in *Inhbe*<sup>-/-</sup> mice on chow diet (*n* = 17-18). Mean ± s.e.m. are shown in all graphs. \*P<0.05, \*\*P<0.01, \*\*\*P<0.001.

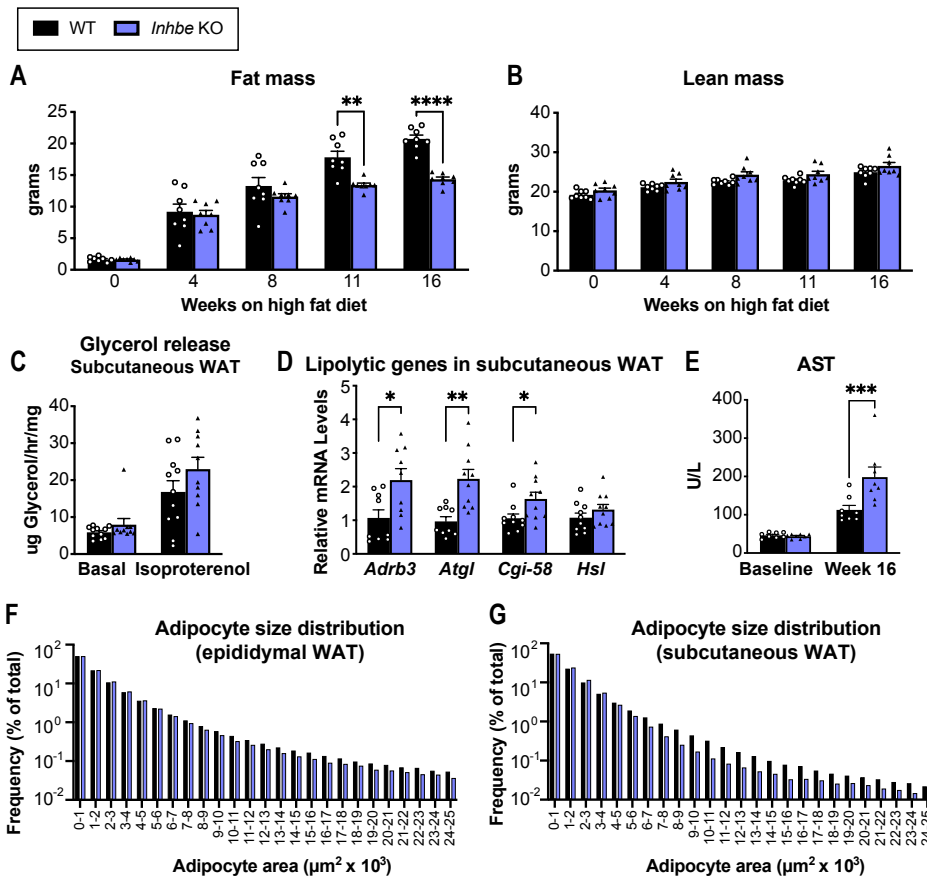

**Fig. S3.** *Inhbe* KO mice accrue less fat mass on HFD. (A and B) Body composition measured by echoMRI to determine fat (A) and lean mass (B) of male WT and *Inhbe*<sup>-/-</sup> mice on HFD (*n* = 8). (C) *Ex vivo* lipolysis with subcutaneous WAT explants from WT and *Inhbe*<sup>-/-</sup> mice on HFD (*n* = 10-11). (D) Subcutaneous WAT mRNA levels of genes involved in adipose lipolysis (*n* = 9-10). (E) Plasma AST levels in *Inhbe*<sup>-/-</sup> mice before and after 16 weeks of HFD (*n* = 8). (F and G) Adipocyte morphology and size distribution measured by imaging software in H&E-stained epididymal (F) and subcutaneous (G) WAT sections following HFD (*n* = 1288100 cells for WT epididymal WAT, 1034341 for *Inhbe*<sup>-/-</sup> epididymal WAT, 1395482 for WT subcutaneous WAT, and 1140473 cells for *Inhbe*<sup>-/-</sup> subcutaneous WAT analyzed from 10-11 mice/group). Mean ± s.e.m. are shown in all graphs besides (F and G), where mean is shown. \**P*<0.05, \*\**P*<0.01, \*\*\*\**P*<0.0001.

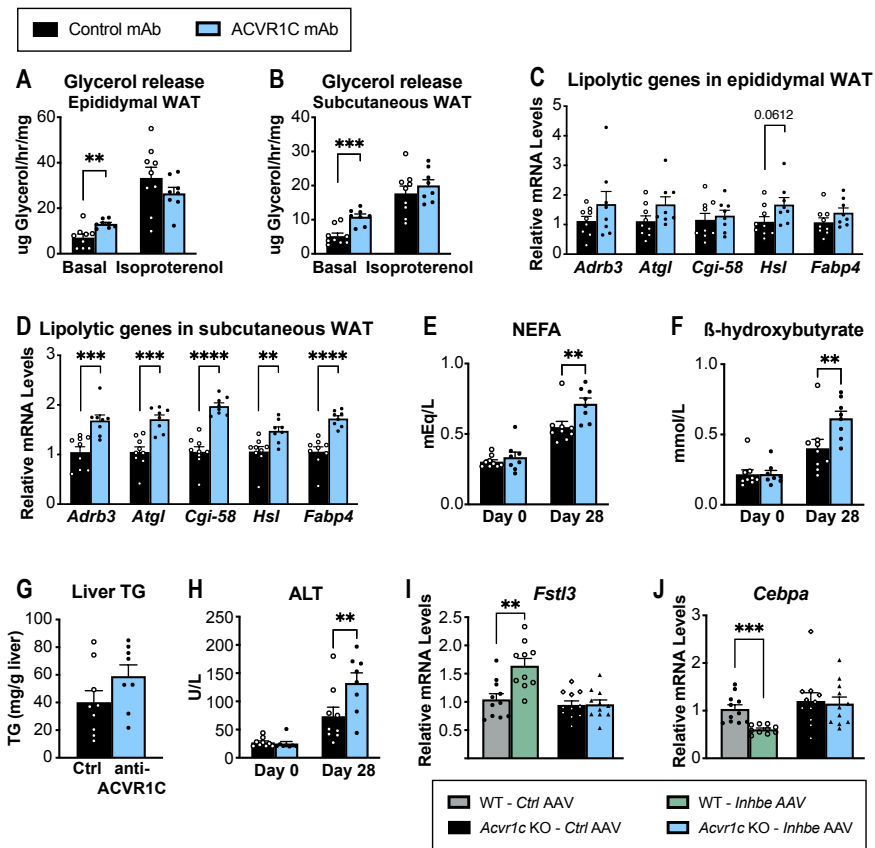

**Fig. S4.** ACVR1C inhibition parallels phenotypes in *Inhbe* KO mice. (A and B) *Ex vivo* lipolysis with epididymal (A) and subcutaneous (B) WAT explants from control mAb or ACVR1C mAb-treated mice ( $n = 8-9$ ). (C and D) mRNA levels of genes involved in adipose lipolysis in epididymal (C) and subcutaneous (D) WAT ( $n = 8-9$ ). (E and F) Fasted plasma NEFA (E) and beta-hydroxybutyrate (F) levels on HFD ( $n = 8-9$ ). (G and H) Fasted hepatic triglyceride content (G), and plasma ALT levels (H) in Control mAb or ACVR1C mAb-treated mice ( $n = 8-9$ ). (I and J) Epididymal WAT mRNA levels of activin target gene *Fstl3* (I) and adipose transcription factor *Cebpa* (J), relative to *Control* AAV in WT and *Acvr1c*<sup>-/-</sup> mice ( $n = 10-11$ ). Mean  $\pm$  s.e.m. are shown in all graphs. \*\* $P < 0.01$ , \*\*\* $P < 0.001$ , \*\*\*\* $P < 0.0001$ .

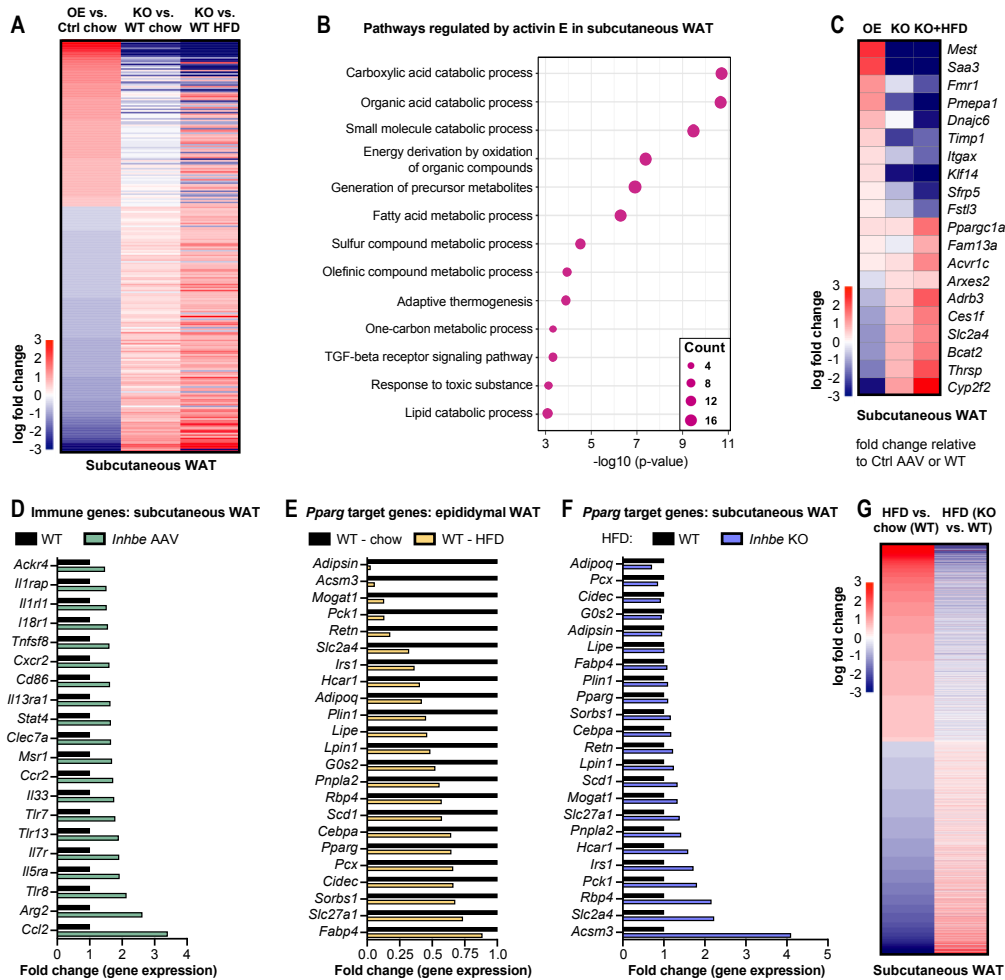

**Fig. S5.** Activin E control adipose metabolic gene expression. (A) Heatmap of subcutaneous adipose transcriptome signatures comparing *Inhbe* over-expression, *Inhbe* KO on chow and high fat diet (HFD) vs. control-treated or WT mice, respectively. (B) Dot plots showing top biological pathways for oppositely regulated genes (*Inhbe* over-expression vs. KO) in subcutaneous WAT. (C) Heatmap showing examples of oppositely regulated genes (*Inhbe* over-expression vs. KO) in subcutaneous WAT. (D) Relative gene expression levels of immune-related genes in subcutaneous WAT, comparing *Inhbe* over-expression vs. control. (E) Relative gene expression levels of PPARG target genes in epididymal WAT, comparing WT mice on chow vs. high fat diet. (F) Relative gene expression levels of PPARG target genes in subcutaneous WAT, comparing *Inhbe* KO and WT mice on high fat diet. (G) Heatmap of subcutaneous adipose

transcriptome signatures comparing WT chow vs. HFD, and *Inhbe* KO vs. WT on high fat diet (HFD), demonstrating *Inhbe* LOF reverses many of the HFD effects seen in WT mice.



**Dataset S1:** List of oppositely regulated genes by *Inhbe* over-expression and knockout in epididymal and subcutaneous adipose tissue

**Dataset S2:** Pathway analysis of differentially expressed genes in epididymal and subcutaneous adipose tissue upon *Inhbe* over-expression and knockout.
